# Supplementary material for: Selective Release of MicroRNA Species from Normal and Malignant Mammary Epithelial Cells
Source: PubMed Central journal article supplement (PMC2958125; doi:10.1371/journal.pone.0013515), 2010-10-20
Supplement: pone.0013515.s002.pdf [file pone.0013515.s002.pdf]

## Supplemental Table S1. RRNA and snRNA fragments detected in unique RNA band of extracellular miRNAs

(Figure 1, D and E, star)

### Table S1A

Hs 5.8S ribosomal RNA

|             |            |            |                  |                    |                   |
|-------------|------------|------------|------------------|--------------------|-------------------|
| 1           | GACTCTTAGC | GGTGGATCAC | TCGGCTCGTG       | CGTCGATGAAG        | AACGCAGCTAG       |
| 51          | CTGCGAGAAT | TAATGTGAAT | TGCAGGACAC       | ATTGATCATCG        | ACACTTCGAAC       |
| 101         | GCACTTGCGG | CCCCGGGTC  | CTCCCGGGC        | TACGCCTGTCT        | GAGCGTCGCTT       |
| <b>2_B1</b> |            |            | <b>CTCCCGGGC</b> | <b>TACGCCTGTCT</b> | <b>GAGCGTCGC</b>  |
| <b>1_B2</b> |            |            | <b>CTCCCGGGC</b> | <b>TACGCCTGTCT</b> | <b>GAGCGTCGC</b>  |
| <b>1_D2</b> |            |            | <b>CTCCCGGGC</b> | <b>TACGCCTGTCT</b> | <b>GAGCGTCGC</b>  |
| <b>2_E2</b> |            | <b>C</b>   | <b>CTCCCGGGC</b> | <b>TACGCCTGTCT</b> | <b>GAGCGTCGCT</b> |

### Table S1B

Hs U1A small nuclear RNA (RNU1A)

|             |            |            |                       |                   |                   |
|-------------|------------|------------|-----------------------|-------------------|-------------------|
| 1           | ATACTTACCT | GGCAGGGGAG | ATACCATGAT            | CACGAAGGTG        | GTTTTCCCAG        |
| <b>2_B3</b> |            |            | <b>GAG ATACCATGAT</b> | <b>CACGAAGGTG</b> | <b>GTTTTCCCAG</b> |
| <b>1_E3</b> |            |            | <b>GAG ATACCATGAT</b> | <b>CACGAAGGTG</b> | <b>GTTTTCCCAG</b> |
| 51          | GGCGAGGCTT | ATCCATTGCA | CTCCGGATGT            | GCTGACCCCT        | GCGATTTCCC        |
| <b>2_B3</b> |            |            | <b>GGCGAGGC</b>       |                   |                   |
| <b>1_E3</b> |            |            | <b>GGCGAGGC</b>       |                   |                   |
| 101         | CAATGTGGG  | AAACTCGACT | GCATAATTTG            | TGGTAGTGGG        | GGACTGCGTT        |
| 151         | CGCGCTTTCC | CCTG       |                       |                   |                   |

## Supplemental Table S2. RNA Subpopulation Enriched in the Extracellular Space

(D1, D2, D3: cellular sequences, others, extracellular.)

1-5035 Homo sapiens 28S ribosomal RNA (LOC100008589), NR\_003287

|                |                   |                   |                   |                   |                   |                   |                  |                   |                   |                   |
|----------------|-------------------|-------------------|-------------------|-------------------|-------------------|-------------------|------------------|-------------------|-------------------|-------------------|
| 1              | CGCGACCTCA        | GATCAGACGT        | GGCGACCCGC        | TGAATTTAAG        | CATATTAGTC        | AGCGGAGGAA        | AAGAACTAA        | CCAGGATTCC        | CTCAGTAACG        | GCGAGTGAAC        |
| <b>mir-923</b> |                   |                   |                   |                   | <b>TATTTGTC</b>   | <b>AGCGGAGGAA</b> | <b>AAGAACTAA</b> | <b>CCAGGATTCC</b> | <b>CTCAGTAATG</b> | <b>GCGAGTG</b>    |
| <b>G2</b>      |                   |                   |                   |                   |                   |                   |                  |                   | <b>TAACG</b>      | <b>GCGAGTGAAC</b> |
| <b>D3</b>      |                   |                   |                   |                   |                   |                   |                  |                   | <b>TAACG</b>      | <b>GCGAGTGAAC</b> |
| <b>C3</b>      |                   |                   |                   |                   |                   |                   |                  |                   | <b>AGGTAACG</b>   | <b>GCGAGTGAAC</b> |
| <b>D1</b>      |                   |                   |                   |                   |                   |                   |                  |                   |                   | <b>TGAAC</b>      |
| <b>G1</b>      |                   |                   |                   |                   |                   |                   |                  |                   |                   | <b>TGAAC</b>      |
| <b>E1</b>      |                   |                   |                   |                   |                   |                   |                  |                   |                   | <b>TAGGT</b>      |
| 101            | AGGGAAGAGC        | CCAGCGCCGA        | ATCCCCGCCC        | CGCGGGGCGC        | GGGACATGTG        | GCGTACGGAA        | GACCCGCTCC       | CCGGCGCCGC        | TCGTGGGGGG        | CCCAAGTCCT        |
| <b>G2</b>      | <b>AGGGAAGAGC</b> | <b>CCAGCGCCGA</b> | <b>ATCCCCGCCC</b> | <b>CGC</b>        |                   |                   |                  |                   |                   |                   |
| <b>D3</b>      | <b>AGGGAAGAGC</b> | <b>CCAGCGCCGA</b> | <b>ATCCCCGCCC</b> | <b>CGC</b>        |                   |                   |                  |                   |                   |                   |
| <b>C3</b>      | <b>AGGGAAGAGC</b> | <b>CCAGCGCCGA</b> | <b>ATCCCCGCCC</b> | <b>CGC</b>        |                   |                   |                  |                   |                   |                   |
| <b>D1</b>      | <b>AGGGAAGAGC</b> | <b>CCAGCGCCGA</b> | <b>ATCCCCGCCC</b> | <b>CGC</b>        |                   |                   |                  |                   |                   |                   |
| <b>G1</b>      | <b>AGGGAAGAGC</b> | <b>CCAGCGCCGA</b> | <b>ATCCCCGCCC</b> | <b>CGC</b>        |                   |                   |                  |                   |                   |                   |
| <b>C2</b>      | <b>AGGGAAGAGC</b> | <b>CCAGCGCCGA</b> | <b>ATCCCCGCCC</b> | <b>CGC</b>        |                   |                   |                  |                   |                   |                   |
| <b>E1</b>      | <b>AGGGAAGAGC</b> | <b>CCAGCGCCGA</b> | <b>ATCCCCGCCC</b> | <b>CGC</b>        |                   |                   |                  |                   |                   |                   |
| <b>B3</b>      |                   |                   |                   | <b>GGCGGGGCGC</b> | <b>GGGACATGTG</b> | <b>GCGTACGGAA</b> | <b>GACCCGC</b>   |                   |                   |                   |
| <b>D2</b>      |                   |                   |                   | <b>AGGGGGGCGC</b> | <b>GGGACATGTG</b> | <b>GCGTACGGAA</b> | <b>GACCCGC</b>   |                   |                   |                   |
| 201            | TCTGATCGAG        | GCCAGCCCG         | TGGACGGTGT        | GAGGCCGGTA        | GCGGCCGGCG        | CGCGCCCGGG        | TCTTCCCGGA       | GTCGGGTGTC        | TTGGGAATGC        | AGCCCAAAGC        |
| 301            | GGGTGGTAA         | CTCCATCTAA        | GGCTAAATAC        | CGGCACGAGA        | CCGATAGTCA        | ACAAGTACCG        | TAAGGGAAAG       | TTGAAAAGAA        | CTTTGAAGAG        | AGAGTTCAAG        |
| 401            | AGGCGTGAA         | ACCGTTAAGA        | GGTAAACGGG        | TGGGGTCCCG        | GCAGTCCGCC        | CGGAGGATTG        | AACCCGGCGG       | CGGGTCCGGC        | CGTGTCCGGC        | GCCCGGCGGA        |

501 TCTTTCCTCCG CCCCCTTCC TCCCGACCCC TCCACCCGCC CTCCCTTCCC CCGCCGCCCC TCCTCCTCCT CCCCAGAGGG GCGGGGTCC GCGGGGTGCG  
601 GGGGTGGGCG GCGGGGGCCG GGGGTGGGGT CCGCGGGGGA CCGTCCCCCG ACCGGCGACC GGCCGCCGCC GGGCGCATTT CCACCCGGCG GGTGCGCCGC  
701 GACCGCTCC GGGACGGCTG GGAAGGCCCG GCGGGGAAGG TGGCTCGGGG GGCCCGTCC GTCCGTCCGT CCTCCTCTC CCCCCTCTCC GCCCCCGGGC  
**A2** **GACCGCTCC GGGACGGCTG GGAAGGCCCG GCGGGGAAGG T**  
**C2** **GACCGCTCC GGGACGGCTG GGAAGGCCCG GCGGGGAAGG T**  
**E2** **TCTCCTC CCCCCTCTCC GCCCCCGGGC**  
801 CCCCGCTCCT CCCTCGGGAG GCGCGCGCGG TCGGGCGCGG GCGGGCGGGC GCGGTGGCGG CCGCGCGGGG GCGCGCGGGA CCGAAACCCC CCCCAGTGT  
**E2** **CCCGCTCCT CCCT**  
901 TACAGCCCC CCGCAGCAG CACTCGCCGA ATCCCGGGG CGAGGGAGCG AGACCCGTCG CCGCGCTCTC CCCCCTCCCG GCGCCCACCC CCGCGGGGAA  
**G2** **CGAGGGAGCG AGACCCGTCG CCGCGCT**  
1001 TCCCCCGCGA GGGGGTCTC CCCCAGGGG GCGCGCGCGG GTCTCCTCGT GGGGGGGCGG GGCACCCCT CCCACGGCG GACCGTCTC CCACCCCTCC  
1101 TCCCCCGCGC CCGCCCCCGG CGACGGGGG GGTGCGCGC GCGGGTCGGG GGGCGGGGCG GACTGTCCCC AGTGCGCCC GGGCGGGTCG CGCCGTCTGGG  
1201 CCGGGGGGAG GTTCTCTCGG GGCACCGCG CCGTCCCCCG AAGAGGGGGA CCGCGGAGCG AGCGCACGGG GTCGGGCGCG ACGTGCGCTA CCCACCCGAC  
1301 CCGTCTTGAA ACACGGACA AGGAGTCTAA CACGTGCGCG AGTCGGGGG TCGCACGAAA GCGCCGCTGG CGCAATGAAG GTGAAGGCCG GCGCGCTCGC  
1401 CGGCGGAGGT GGGATCCCGA GGCTCTCCA GTCCGCGAG GCGCACACC CCGCCGCTCT CGCCCGCCG GCGGGGAGG TGGAGCACGA GCGCACGTGT  
1501 TAGGACCCGA AAGATGGTGA ACTATGCCTG GGCAGGGCGA AGCCAGAGGA AACTCTGGTG GAGGTCCGTA GCGGTCTCTA CGTGCAAATC GGTCTGTCGA  
1601 CCTGGGTATA GGGCGAAAAG ACTAATCGAA CCATCTAGTA GCTGGTCCC TCCGAAGTTT CCCTCAGGAT AGCTGGCGCT CTCGCAGACC CGACGCACCC  
1701 CCGCCACGCA GTTTTATCCG GTAAAGCGAA TGATTAGAGG TCTTGGGGCC GAAACGATCT CAACCTATTC TCAAACTTTA AATGGGTAAG AAGCCCGGCT  
1801 CGCTGGCGTG GAGCCGGCGG TGGAAATCGA GTGCCTAGTG GGCCACTTTT GGTAAAGCAGA ACTGGCCGCTG CGGGATGAAC CGAACGCCGG GTTAAGGCCG  
1901 CCGATGCCGA CGCTCATCAG ACCCCAGAAA AGGTGTGGT TGATATAGAC AGCAGGACGG TGCCCATGGA AGTCGGAATC CGCTAAGGAG TGTGTAACAA  
2001 CTCACCTGCC GAATCAACTA GCCTGAAAA TGGATGGCGC TGGAGCGTCG GGCCCATACC CGCCGCTCGC GCGCAGTCGA GAGTGACCGG GAGCGCGGG  
2101 GCGCGCGCGC GCGCGCGCGC GTGTGGTGTG CGTCGGAGGG CCGCGCGCGC GCGCGCGCGG GGGGTGTGGG GTCTTCCCC CGCCCCCCC CCCACGCCTC  
**C3** **TG CGTCGGAGGG CCGCGCGCGC GCGCGCGCGG GGGGT**  
**2A** **TG CGTCGGAGGG CCGCGCGCGC GCGCGCGCGG GGGGT**  
2201 CTCCCCTCCT CCGCCCCAG CCCCCTCC CCCCCCGGA GCCCGCGGA CGCTACGCGG CGACGAGTAG GAGGGCCGCT GCGGTGAGCC TTGAAGCCTA  
2301 GGGCGCGGGC CCGGTGGAG CCGCCGCGAG TGCAGATCTT GGTGGTAGTA GCAAATATTC AAACGAGAAC TTTGAAGGCC GAAGTGAGAG AGGGTTCCAT  
2401 GTAACAGCA GTTGAACATG GGTACGTCG TCCTGAGAGA TGGGCGAGCG CCGTCCGAA GGGACGGGCG ATGGCCTCCG TTGCCCTCG CCGATCGAAA  
2501 GGGAGTCGGG TTCAGATCCC CGAATCCGGA GTGGCGGAGA TGGGCGCCG GAGGCGTCCA GTGCGGTAAC GCGACCGATC CCGGAGAAGC CCGCGGGAGC  
2601 CCGGGGAGA GTTCTCTTTT CTTTGTGAAG GGCAGGGCGC CCTGGAATGG GTTCGCCCC AGAGAGGGG CCGTGCCTTG GAAAGCTCG CCGTCCCGC  
**G3** **GT CCTGGAATGG GTTC**  
2701 GCGTCCGGT GAGCTCTCG TGGCCCTTGA AAATCCGGG GAGAGGGTGT AAATCTCGG CCGGGCCGTA CCCATATCCG CAGCAGGTCT CCAAGGTGAA  
2801 CAGCTCTGG CATGTTGAA CAATGTAGGT AAGGGAAGTC GGCAAGCCGG ATCCGTAACT TCGGATAAG GATTGGCTCT AAGGGCTGGG TCGGTGCGG  
2901 TGGGGCGCGA AGCGGGGCTG GCGCGCGCC GCGGTGGAC GAGGCGCGG CCCCCCCAC GCCCGGGCA CCCCCCTCG GGCCCTCCC CGCCCCACC  
3001 GCGCGCGCG CTGCTCCTT CCCCACCCG CGCCCTCTCT CTCTCTCTCT CCCCCTCC CCGTCTCC CCGTCCCGG GGGAGCGCG CGTGGGGGCG  
3101 CCGCGGGGG AGAAGGGTGC GGGCGGACG GCGCGCGCG CCGCCCGCG GCGCGCGCG GGGGGCAGGT CCCCAGAGG GGGGCCCCG GGACCCGGG  
3201 GCGCGCGCG GGGCGGACT CTGGACCGA GCGGGCCCT TCCCGTGGAT CGCCCAAGT GCGCGGGCG TCGCGGGCG CCCCAGGAG CCGCGCGCG  
3301 GCGCGCGCG CCCCCACCC CCACCCACG TCTCGGTGCG GCGCGCGTCC GCTGGGGCG GGAGCGGTG GCGCGCGCG GTCGCGGGG GCGGGGGCG  
3401 GCGGTTCGT CCCCCGCGC TACCCCCCG GCCCGTCCG CCCCCTCT CCCCCTCT CCGCGCGCG GCGCGCGCG GCGCGAGCG GCGGAGGGG  
3501 CCGGGGCCG TCCCCCGCG CCGGTCCGCC CCGGGGGCG CGGTTCGCG CCGCCTCGC CTCGGCCGG CCCTAGCAG CACTTAGAA CTGGTCCGA  
3601 CCAGGGGAA CCGACTGTTT AATTAACA AAGCATCGG AAGGCCCGG GCGGGTGTG ACGCATGTG ATTTCTGCCC AGTGTCTGA ATGTCAAAGT  
3701 GAAGAAATC AATGAAGCG GGTAAACCG CCGGAGTAAC TATGACTCT TTAAGGTAG CAAATGCCTC GTCATCTAAT TAGTGACCG CATGAATGGA  
3801 TGAACGAGT TCCCACTGTC CCTACTACT ATCCAGCGAA ACCACAGCA AGGGAACGG CTTGGCGGAA TCAGCGGGG AAGAAGACC TGTGAGCTT  
3901 GACTCTAGT TGGCACGGT AAGAGACATG AGAGGTGTAG AATAAGTGG AGGCCCCCG CCCCCCCC GTGTCCCCG GAGGGGCCG GGGCGGGTC  
4001 CCGCGCCCTG CCGCGCGCG GTGAAATACC ACTACTCTGA TCGTTTTTC ACTGACCCG TGAGGCGGG GGGCGAGCC GAGGGCTCT CGCTTCTGG  
4101 GCCAAGCGC CCGCGCGCG GCGCGACCC GCTCCGGGA CAGTGCCAG TGGGGAGTTT GACTGGGGCG GTACACCTGT CAAACGGTA CGCAGGTGTC  
**H2** **CAGG TGGGGAGTTT GACTGGGGCG GTACACCTGT CAAACGGT**  
**A3** **CAGG TGGGGAGTTT GACTGGGGCG GTACACCTGT CAAACGGT**  
4201 CTAAGCGAG CTAGGGAGG ACAGAAACCT CCCGTGGAGC AGAAGGGCAA AAGTCGCTT GATCTTGATT TTCAGTACGA ATACAGACCG TGAAAGCGGG  
4301 GCCTCACGAT CCTTCTGACC TTTTGGGTTT TAAGCAGGAG GTGTGAGAAA AGTTACCACA GGGATAACTG GCTTGTGGCG GCCAAGCGTT CATAGCGAGC  
4401 TCGTTTTTT ATCCTTCGAT GTCGGCTCTT CCTATCATTG TGAAGCAGAA TTCGCCAAGC GTTGGATTGT TCACCCACTA ATAGGGAACG TGAGCTGGGT  
4501 TTAGACCGTC GTGAGACAGG TTAGTTTTTAC CCTACTGATG ATGTGTGTGTT GCCATGGTAA TCCTGCTCAG TACGAGAGGA ACCGCAGGTT CAGACATTTG  
4601 GTGTATGTGC TTGGCTGAGG AGCCAATGGG GCGAAGCTAC CATCTGTGGG ATTTAGACTG AACGCTCTA AGTCAGAAAT CCGCCAGGC GAACGATAGC  
4701 GCAGCGCCCG GGAGCCTCGG TTGGCTCGG ATAGCCGGTC CCCCCTCTGT CCCCCTCGG GGGCCGCCC CCCCTCCAG CGCCCCCGG CCGGAGGGCG  
4801 CGTCCCCCG CCGCGCGCG GACCGGGGTC CGGTGCAGG TGCCCTCTGT CCTGGGAAAC GGGCGCGCG CCGAAAGCG GCGCCGCCCT CGCCGCTCAC  
4901 GCACCGCACG TTCGTGGGGA ACCTGGCGCT AAACCATTG TAGACGACCT GCTTCTGGGT CGGGGTTTCG TACGTAGCAG AGCAGCTCCC TCGTCTCGAT  
5001 CTATTGAAA TCAGCCCTCG ACACAAGGGT TTGTC

## Supplemental Table S3 Oligonucleotides used for Mature miRNA Quantitation

|            | primers<br>for linker ligation<br>only | for linker ligation<br>and stem-loops | for stem loops<br>only | sequence          | Stem looped primer                                  |
|------------|----------------------------------------|---------------------------------------|------------------------|-------------------|-----------------------------------------------------|
| let-7c     |                                        | hsa-let7c_15                          |                        | TGAGGTAGTAGGTTG   | GTCGTATCCAGTGCAGGGTCCGAGGTATTCGCACTGGATACGACAACC    |
| let-7f     | hsa-let7f_14                           |                                       |                        | TGAGGTAGTAGATTG   | N/A                                                 |
| let-7g     |                                        | hsa-let7g_16                          |                        | TGAGGTAGTAGTTTGT  | GTCGTATCCAGTGCAGGGTCCGAGGTATTCGCACTGGATACGACAAC     |
| miR-107    |                                        | hsa-miR107_15                         |                        | AGCAGCATTGTACAG   | GTCGTATCCAGTGCAGGGTCCGAGGTATTCGCACTGGATACGACtga     |
| miR-1246   |                                        | hsa-miR1246_16                        |                        | AATGGATTTTTGGAGC  | GTCGTATCCAGTGCAGGGTCCGAGGTATTCGCACTGGATACGACCCTG    |
| miR-1275   | hsa-miR-1275_14                        |                                       |                        | GTGGGGGAGAGGCT    | N/A                                                 |
| miR-1275   |                                        |                                       | hsa-miR-1275_15*       | GTGGGGGAGAGGCT    | GTCGTATCCAGTGCAGGGTCCGAGGTATTCGCACTGGATACGACGACA    |
| miR-148a   |                                        |                                       | miR-148a_15            | tcagtgcactacagaa  | GTCGTATCCAGTGCAGGGTCCGAGGTATTCGCACTGGATACGACacaaa   |
| miR-149*   |                                        | hsa-miR149*_15                        |                        | AGGGAGGGACGGGGG   | GTCGTATCCAGTGCAGGGTCCGAGGTATTCGCACTGGATACGACCTCC    |
| miR-16     |                                        | hsa-miR16_14                          |                        | TAGCAGCACGTA      | GTCGTATCCAGTGCAGGGTCCGAGGTATTCGCACTGGATACGACcgcca   |
| miR-1915   | hsa-miR1915_15                         |                                       |                        | CCCCAGGGCGACGCG   | N/A                                                 |
| miR-196a   |                                        |                                       | miR-196a_15            | taggtagttcatgt    | GTCGTATCCAGTGCAGGGTCCGAGGTATTCGCACTGGATACGACcccaa   |
| miR-200b   |                                        |                                       | miR-200b_15            | taatactgcctgta    | GTCGTATCCAGTGCAGGGTCCGAGGTATTCGCACTGGATACGACtcatca  |
| miR-200c   | hsa-miR200c_14                         |                                       |                        | TAATACTGCCGGGT    | N/A                                                 |
| miR-21     |                                        | hsa-mir21_15                          |                        | TAGCTTATCAGACTG   | GTCGTATCCAGTGCAGGGTCCGAGGTATTCGCACTGGATACGACtcaacc  |
| miR-210    |                                        |                                       | miR-210_15             | ctgtgctgtgacag    | GTCGTATCCAGTGCAGGGTCCGAGGTATTCGCACTGGATACGACtgcagcc |
| miR-22     | hsa-miR-22_14                          |                                       |                        | AAGCTGCCAGTTGA    | N/A                                                 |
| miR-23a    |                                        | hsa-miR23a_14                         |                        | ATCACATTGCCAGG    | GTCGTATCCAGTGCAGGGTCCGAGGTATTCGCACTGGATACGACGGAA    |
| miR-27b    |                                        | hsa-miR27b_14-5                       |                        | CAGTGGCTAAGTTC    | N/A                                                 |
| miR-30c    | hsa-miR30c_15                          |                                       |                        | TGTAACATCCTACA    | N/A                                                 |
| miR-335    |                                        |                                       | miR-335_15             | tcaagagcaataacg   | GTCGTATCCAGTGCAGGGTCCGAGGTATTCGCACTGGATACGACacattt  |
| miR-345    | hsa-miR345_15                          |                                       |                        | GCTGACTCCTAGTCC   | N/A                                                 |
| miR-373    |                                        |                                       | miR-373_15             | gaagtgcctgatt     | GTCGTATCCAGTGCAGGGTCCGAGGTATTCGCACTGGATACGACacacc   |
| miR-451    |                                        | hsa-miR451_16                         |                        | AAACCGTTACCATTAC  | GTCGTATCCAGTGCAGGGTCCGAGGTATTCGCACTGGATACGACAAC     |
| miR-483-5P |                                        | hsa-miR483-5p_15                      |                        | AAGACGGGAGGAAAG   | GTCGTATCCAGTGCAGGGTCCGAGGTATTCGCACTGGATACGACCTCC    |
| miR-520c   |                                        |                                       | miR-520c_15            | aaagtgcctcttt     | GTCGTATCCAGTGCAGGGTCCGAGGTATTCGCACTGGATACGACaccctc  |
| miR-638    | hsa-miR638_15                          |                                       |                        | AGGGATCGCGGGCGG   | N/A                                                 |
| miR-720    |                                        | hsa-miR720_15                         |                        | TCTCGTGGGGCCTC    | GTCGTATCCAGTGCAGGGTCCGAGGTATTCGCACTGGATACGACTGGA    |
| miR-99a    |                                        | hsa-miR100_15                         |                        | AACCCGTAGATCCGA   | GTCGTATCCAGTGCAGGGTCCGAGGTATTCGCACTGGATACGACcacia   |
| MODBAN     | 3'modban_rcrtPCR                       |                                       |                        | ATTGATGGTGCCTACAG |                                                     |

## Supplemental Table S4 Stem Looped Primers used for Simultaneous Analyses of Multiple Transcripts

### STEM-LOOPED PRIMER AMPLIFICATION

| hsa-                            | MIRNA SEQUENCE                 | PRIMER NAME                     | PRIMER SEQUENCE                                                                       |
|---------------------------------|--------------------------------|---------------------------------|---------------------------------------------------------------------------------------|
| miR-16                          | <u>UAGCAGCACGUAAAUAUUGGCG</u>  | hsa-miR-16-14<br>miR-16_14-loli | <u>TAGCAGCACGTAAA</u><br>GTCGTATCCAGTGCAGGGTCCGAGGTATTGCGACTGGATACGACC <u>CGCAA</u>   |
| miR-1246                        | <u>AAUGGAUUUUUGGAGCAGG</u>     | 1246_loli<br>1246_16            | GTCGTATCCAGTGCAGGGTCCGAGGTATTGCGACTGGATACGACC <u>CTGCT</u><br><u>AATGGATTTTTGGAGC</u> |
| miR-720                         | <u>UCUCGCUGGGGCCUCCA</u>       | 720_loli<br>720_14              | GTCGTATCCAGTGCAGGGTCCGAGGTATTGCGACTGGATACGACT <u>GAGAGG</u><br><u>CTCGCTGGGGCCTC</u>  |
| miR-451                         | <u>AAACCGUUACCAUUAUCUGAGUU</u> | 451_loli<br>hsa-miR451_15       | GTCGTATCCAGTGCAGGGTCCGAGGTATTGCGACTGGATACGACA <u>ACTCA</u><br><u>AAACCGTTACCATTA</u>  |
| let-7g                          | <u>UGAGGUAGUAGUUUGUACAGUU</u>  | let-7g-1o1i<br>hsa-let-7g-16    | GTCGTATCCAGTGCAGGGTCCGAGGTATTGCGACTGGATACGACA <u>ACTGT</u><br><u>TGAGGTAGTAGTTTGT</u> |
| miR-99A<br>(miR-100)            | <u>AACCCGUAGAUCCGAUCUUGUG</u>  | miR-100-loli<br>100-15          | GTCGTATCCAGTGCAGGGTCCGAGGTATTGCGACTGGATACGACC <u>ACAAG</u><br><u>AACCCGTAGATCCGA</u>  |
| miR-210                         | <u>CUGUGCGUGUGACAGCGGCUGA</u>  | miR-210-loli<br>miR-210_15      | GTCGTATCCAGTGCAGGGTCCGAGGTATTGCGACTGGATACGACT <u>CAGCC</u><br><u>CTGTGCGTGTGACAG</u>  |
| internal<br>loading<br>control: |                                |                                 |                                                                                       |
| INT-RNA                         | <u>GGAAAGGGGAACCCCU</u> GUGUGU | INT_RNA-loli<br>INT_15          | GTCGTATCCAGTGCAGGGTCCGAGGTATTGCGACTGGATACGACA <u>CACAC</u><br><u>GGAAAGGGGAACCCCU</u> |
|                                 |                                | INT_RNA                         | GGGGGAAAAACCCUUUUUCC                                                                  |
| miR-1275                        | <u>GUGGGGGAGAGGCUGUC</u>       | 1275_loli<br>hsa-miR-1275_15*   | GTCGTATCCAGTGCAGGGTCCGAGGTATTGCGACTGGATACGAC <u>GACAGC</u><br><u>GTGGGGGAGAGGCT</u>   |
| lolirev                         |                                | loli_rev                        | GTGCAGGGTCCGAGGT                                                                      |

## Supplemental Table S5. Confirmed sequences of qPCR products quantified using linker ligated primers

**hsa-miR-221** **AGCUACAUUGUCUGCTGGGUUUC**  
1\_B05\_271599\_ECRC AGCTACATTGTCTGCTGGGTTTC  
1\_F03\_271602\_CCRC AGCTACATTGTCTGCTGGGTTTC  
1\_B04\_271597\_EA AGCTACATTGTCTGCTGGGTTTC  
1\_F02\_271600\_CA AGCTACATTGTCTGCTGGGTTAC  
1\_F04\_271598\_EBRC AGCTACATTGTCTGCTGGGTTTC

**hsa-miR-222** **AGCUACAUCUGGCUACUGGGU**  
1\_C04\_271603\_EA AGCTACATCTGGCTACTGGGT  
1\_G04\_271604\_EB AGCTACATCTGGCTACTGGGT  
1\_G02\_271606\_CA AGCTACATCTGGCTACTGGGT  
1\_C03\_271607\_CB AGCTACATCTGGCTACTGGGT  
1\_G03\_271608\_CC AGCTACATCTGGCTACTGGGT

**hsa-miR-100** **AACCCGUAGAUCCGAACUUGUG**  
**hsa-miR-99a** **AACCCGUAGAUCCGAUCUUGUG**  
1\_A04\_271609\_EA AACCCGTAGATCCGATCTTGT  
1\_E03\_271614\_CC AACCCGTAGATCCGATCTTGTG  
1\_E02\_271612\_CA AACCCGTAGATCCGATCTTGTG  
1\_A03\_271613\_CB AACCCGTAGATCCGATCTTGT  
1\_A05\_271611\_EC AACCCGTAGATCCGATCTTGTG

**hsa-miR-720** **UCUCGCUGGGGCCUCCA**  
1\_D04\_271615\_EA TATCGCTGGGGCCTCCA  
1\_D05\_271617\_EC TCTCGCTGGGGCCTCCA  
1\_H04\_271616\_EB TCTCGCTGGGGCCTCCA  
1\_D03\_271619\_CB TCTCGCTGGGGCCTCCA  
1\_H02\_271618\_CArc TCTCGCTGGGGCCTCCA

### Confirmed sequences for looped miRs

**hsa-miR-16** **UAGCAGCACGUAAAUAUUGGCG**  
1\_A09\_2742 TAGCAGCACGTAAATATTGGCG  
1\_B09\_2742 TAGCAGCACGTAAATATTGGCG  
1\_H11\_2742 TAGCAGCACGTAAATATTGGCG

**hsa-miR-1246** **AAUGGAUUUUUGGAGCAGG**  
1\_E07\_2742rc AATGGATTTTTGGAGCAGG  
1\_F07\_2742rc AATGGATTTTTGGAGCAGG  
1\_G07\_2742rc AATGGATTTTTGGAGCAGG  
1\_H07\_2742 AATGGATTTTTGGAGCAGG

**hsa-miR-720** **UCUCGCUGGGGCCUCCA**  
1\_H10\_2742 TCTCGCTGGGGCCTCCA  
1\_B11\_2742 TCTCGCTGGGGCCTCCA  
1\_C11\_2742 TCTCGCTGGGGCCTCCA

**hsa-miR-451** **AAACCGUUACCAUACUGAGUU**  
1\_B10\_2742 rc AAACCGTTACCATTACTGAG--  
1\_A10\_2742 rc AAACCGTTACCATTACTGAGTT  
1\_C10\_2742 AAACCGTTACCATTACTGAGTT

**hsa-let-7g** **UGAGGUAGUAGUUUGUACAGUU**  
1\_D11\_2742 TGAGGTAGTAGTTTGTACAGTT  
1\_F11\_2742 TGAGGTAGTAGTTTGTACAGTT

**>hsa-miR-1275**

1\_E08\_2742 Trc  
1\_C08\_2742 Lrc  
1\_H08\_2742 U  
1\_A08\_2742 L

**GUGGGGGAGAGGUGUC**

GTGGGGGAGAGGCTGTC  
GTGGGGGAGAGGCTGTC  
GTGGGGGAGAGGCTGTC  
GTGGGGGAGAGGCTGA-

## Supplemental Table S6. Primers for Quantifying pre-miRNAs and Other Immature miRNAs

| RNA            |       | name             | sequence                     |
|----------------|-------|------------------|------------------------------|
| pre-let-7f     | 5'    | let7Fm-1Fm       | GATTGTATAGTTGTGGGGTAGTG      |
| pre-let-7f     | 3'    | let7Rm-1Rm       | GGGAAGGCAATAGATTGTATAG       |
| pre-let-7g     | 5'    | let7gFm          | GTAGTAGTTTGTACAGTTTGAGGGT    |
| pre-let-7g     | 3'    | let7gRm          | GGCAGTGGCCTGTACAGT           |
| pre-let-7c     | 5'    | let7cFm          | TTGAGGTAGTAGGTTGTATGGTT      |
| pre-let-7c     | 3'    | let7cRm          | GGAAAGCTAGAAGGTTGTACAG       |
| pre-let-7c     | pri-S | Let-7c-US1       | TGAAGCAACATTGGAAGC           |
| pre-let-7c     | pri-L | Let-7c-US2       | TCTATATCCTTGCCAAGCC          |
| pre-miR-100    | 5'    | miR-100Fm        | AACCCGTAGATCCGAACCTTG        |
| pre-miR-100    | 3'    | miR-100Rm        | TACCTATAGATACAAGCTTGTGCG     |
| pre-miR-1246   | 5'    | hsa-miR1246_19   | TTGAATGGATTTTTGGAGC          |
| pre-miR-1246   | 3'    | 1246_matrev_22   | ATTGCTAGCCTATGGATTGATT       |
| pre-miR-1275   | 5'    | hsa-miR-1275_15* | GTGGGGGGAGAGGCT              |
| pre-miR-1275   | 3'    | 1275_mat rev     | TCCCTCTGCCTTGGG              |
| pre-miR-149*   | 5'    | 149*_matfor      | GCCGGCGCCCGAGCT              |
| pre-miR-149*   | 3'    | 149*_matrev      | GCCCCCGTCCCTCCC              |
| pre-miR-155    | 5'    | miR-155Fm        | GTTAATGCTAATCGTGATAGGG       |
| pre-miR-155    | 3'    | miR-155Rm        | GCTAATATGTAGGAGTCAGTTGGA     |
| pre-miR-16     | 5'    | miR-016-1Fmm     | GCAGCACGTAATATTGGCGT         |
| pre-miR-16     | 3'    | miR-016-1Rm      | CAGCAGCACAGTTAATACTGGAGA     |
| pre-miR-1915   | 5'    | 1915_matfor      | TGAGAGGCCGCACCT              |
| pre-miR-1915   | 3'    | 1915_matrev_13   | CGCGTCGCCCTGG                |
| pre-miR-200c   | 5'    | miR-200cFm       | CTCGTCTTACCCAGCAGTGT         |
| pre-miR-200c   | 3'    | miR-200cRm2      | CATCATTACCCGGCAGTATTAG       |
| pre-miR-200c   | pri-S | miR-200c US1     | GAAGCTGCCTGACCCAAG           |
| pre-miR-200c   | pri-L | miR-200c US2     | CAGGGATCTGCAGCTTTTC          |
| pre-miR-221    | 5'    | miR-221Fm        | CCTGGCATACAATGTAGATTTCTG     |
| pre-miR-221    | 3'    | miR-221Rm        | AAACCCAGCAGACAATGTAGCT       |
| pre-miR-221    | pri-S | miR-221 US1      | AAATAGTATGTGAGAATTACTTGCAAGC |
| pre-miR-221    | pri-L | miR-221 US2      | GAAATTTTGTGGTAGTAGGTAAGTCC   |
| pre-miR-222    | 5'    | miR-222(p)Fm     | CCCCAGAAGGCAAAGGAT           |
| pre-miR-222    | 3'    | miR-222(p)Rm     | CTCTCTCAGGACACTGAAGCAG       |
| pre-miR-23a    | 5'    | miR-023aFm       | CTGGGGTTCCTGGGGAT            |
| pre-miR-23a    | 3'    | miR-023aRm       | TGGTAATCCCTGGCAATGTG         |
| pre-miR-27     | 5'    | miR-027a,bFm     | GCAGGGCTTAGCTGCTTG           |
| pre-miR-27     | 3'    | miR-027a,bRm     | GGCGGAACCTTAGCCACTGT         |
| pre-miR-30c    | 5'    | miR-030c-1,2Fm   | TGTGTAAACATCCTACACTCTCAG     |
| pre-miR-30c    | 3'    | miR-030c-1,2Rm   | GAGTAAACAACCCTCTCCCA         |
| pre-miR-451    | 5'    | hsa-miR-451_21   | CAAGGAAACCGTTACCATTAC        |
| pre-miR-451    | 3'    | 451_mat rev      | TCTGGGTATAGCAAGAGAACC        |
| pre-miR-638    | 5'    | 638_13           | AGGGATCGCGGGC                |
| pre-miR-638    | 3'    | 638_matrev       | AGCGCCGCAGTTACG              |
| pre-pre-miR-21 | 5'    | miR-021Fm        | GCTTATCAGACTGATGTTGACTG      |
| pre-pre-miR-21 | 3'    | miR-021Rm        | CAGCCCATCGACTGGTG            |
| pre-pre-miR-21 | pri-S | miR-021 US1      | ATCTCCATGGCTGTACCACC         |
| pre-pre-miR-21 | pri-L | miR-021 US2      | TCAAATCCTGCCTGACTGTC         |





## Supplementary Figures

### Supplemental Figure S1. Some Diagnostic miRNAs are Mostly Retained.

Indicated miRNAs were amplified from RNA collected from cells and the conditioned media of MCF7 cells using looped primers, and separated by native PAGE. **A** miRNAs in which the cellular (c), but not the extracellular (x) RNA population contained the indicated miRNAs. In each case of the cellular sample, the main band (arrow) was excised, cloned and sequenced and found to be the expected amplified product. In the case of extracellular samples the main bands, all of which migrated differently (star), had no resemblance to the miRNA to be amplified as determined by sequencing. **B** miRNAs in which the released miRNA population contained a band of much lower abundance than the retained population.

**Supplemental Figure S2.** Lack of Correlation between Primary Transcript and Release Rate of MiRNAs. Released/retained miRNAs (x/c) as evaluated in Figure 1 are plotted according to chromosomal location (chromosomes 1-X) from top to bottom. Micro-RNA clusters are indicated in color. Note that for cluster miR-200c-141, which is located in a single intron (1), 30 times more of its encoded miR-200c molecules than miR-141 molecules were released from cells (**Figure 2A**, and data not shown) than retained, indicating that the extent of miRNA release is not determined at the primary-miRNA level. In support of this idea, within the other miR-200 cluster, which encodes miR-200a, miR-200b and miR-429 (1), more than half of miR-429 and miR-200b molecules are released, whereas most of miR-200a is retained. Therefore, the extracellular accumulation of mature miRNAs is regulated at levels other than the primary transcript abundance. MicroRNAs contained in particular clusters are indicated by red or green colored bars.

### Supplemental Figure S3. MiR-1246 is a Reliable Indicator of Body Fluids Conditioned by

**Mammary Epithelia.** **A** tumor growth of xenografted cells of mice used for assessment of miRNA

abundance in blood plasma as indicated in Figure 4A. The tumor size is presented as the product of the

3 diameters. Data presented in Figure 6 are from bleeds at day 30 (arrow). **B** PAGE of end-point PCR of miR-1246 of bleeds of MCF7-1 and MDA-MB-231.

#### **Supplemental Figure S4. Fetal Bovine Serum Does Not Interfere With Extracellular MiRNA**

**Assessment. A** Relative abundance of indicated miRNAs in calf serum (CS) and fetal bovine serum (FBS), normalized to INT-RNA. Note the absence of miR-451 from FBS, but that CS contains measurable levels of *Bos taurus* miR-451, which differs from hsa-miR-451 by a single terminal nucleotide (2). **B** End-point PCR using stem-loop primers on extracellular (x) and cellular (c) miR-451 of indicated breast cancer cell lines grown in complete FBS, or in FBS depleted of microvesicles (FBS S100). **C** Ratio of miRNAs in c and x of cells grown in complete FBS and FBS depleted of microvesicles (FBS S100). **D**. MiRNAs measured as in Supplemental Figure S4C, by qRT-PCR using linker-ligation. Error bars indicate standard deviation. A is an average of 2 experiments, C and E are averages of 3 independent experiments.

#### **Supplemental Figure S5. Template-independent amplification products at low template**

**concentrations.** Mature miR-16 was assessed by the stem-loop-primer protocol on 5-fold serial dilutions of a synthetic DNA construct reflecting the expected product of miR-16.

#### **References of Supplementary Material**

1. Bracken CP, Gregory PA, Kolesnikoff N, Bert AG, Wang J, Shannon MF, Goodall GJ. A double-negative feedback loop between ZEB1-SIP1 and the microRNA-200 family regulates epithelial-mesenchymal transition. *Cancer Res.* 2008 Oct 1;68(19):7846-54.
2. Long JE, Chen HX. Identification and characteristics of cattle microRNAs by homology searching and small RNA cloning. *Biochem Genet.* 2009 Jun;47(5-6):329-43.

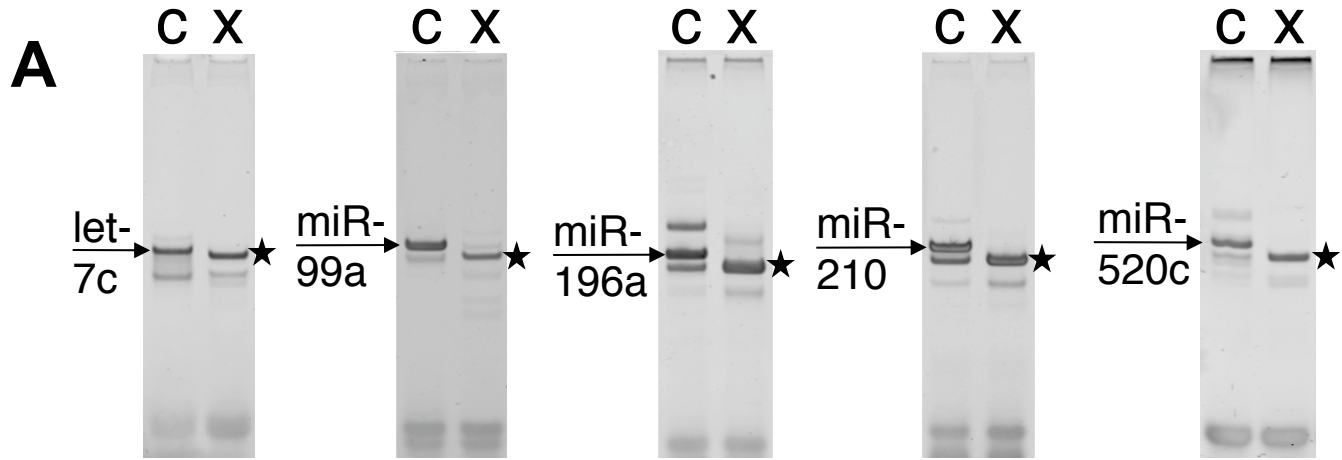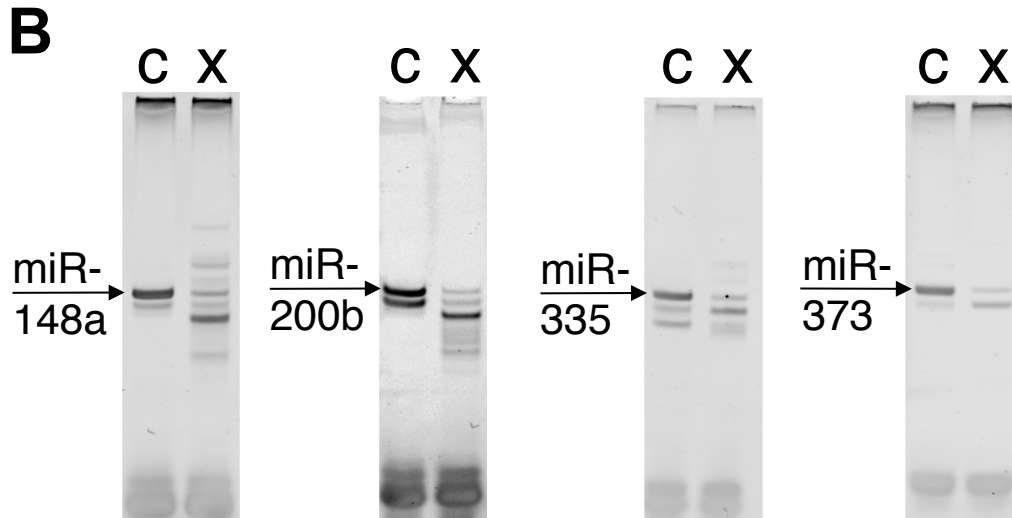

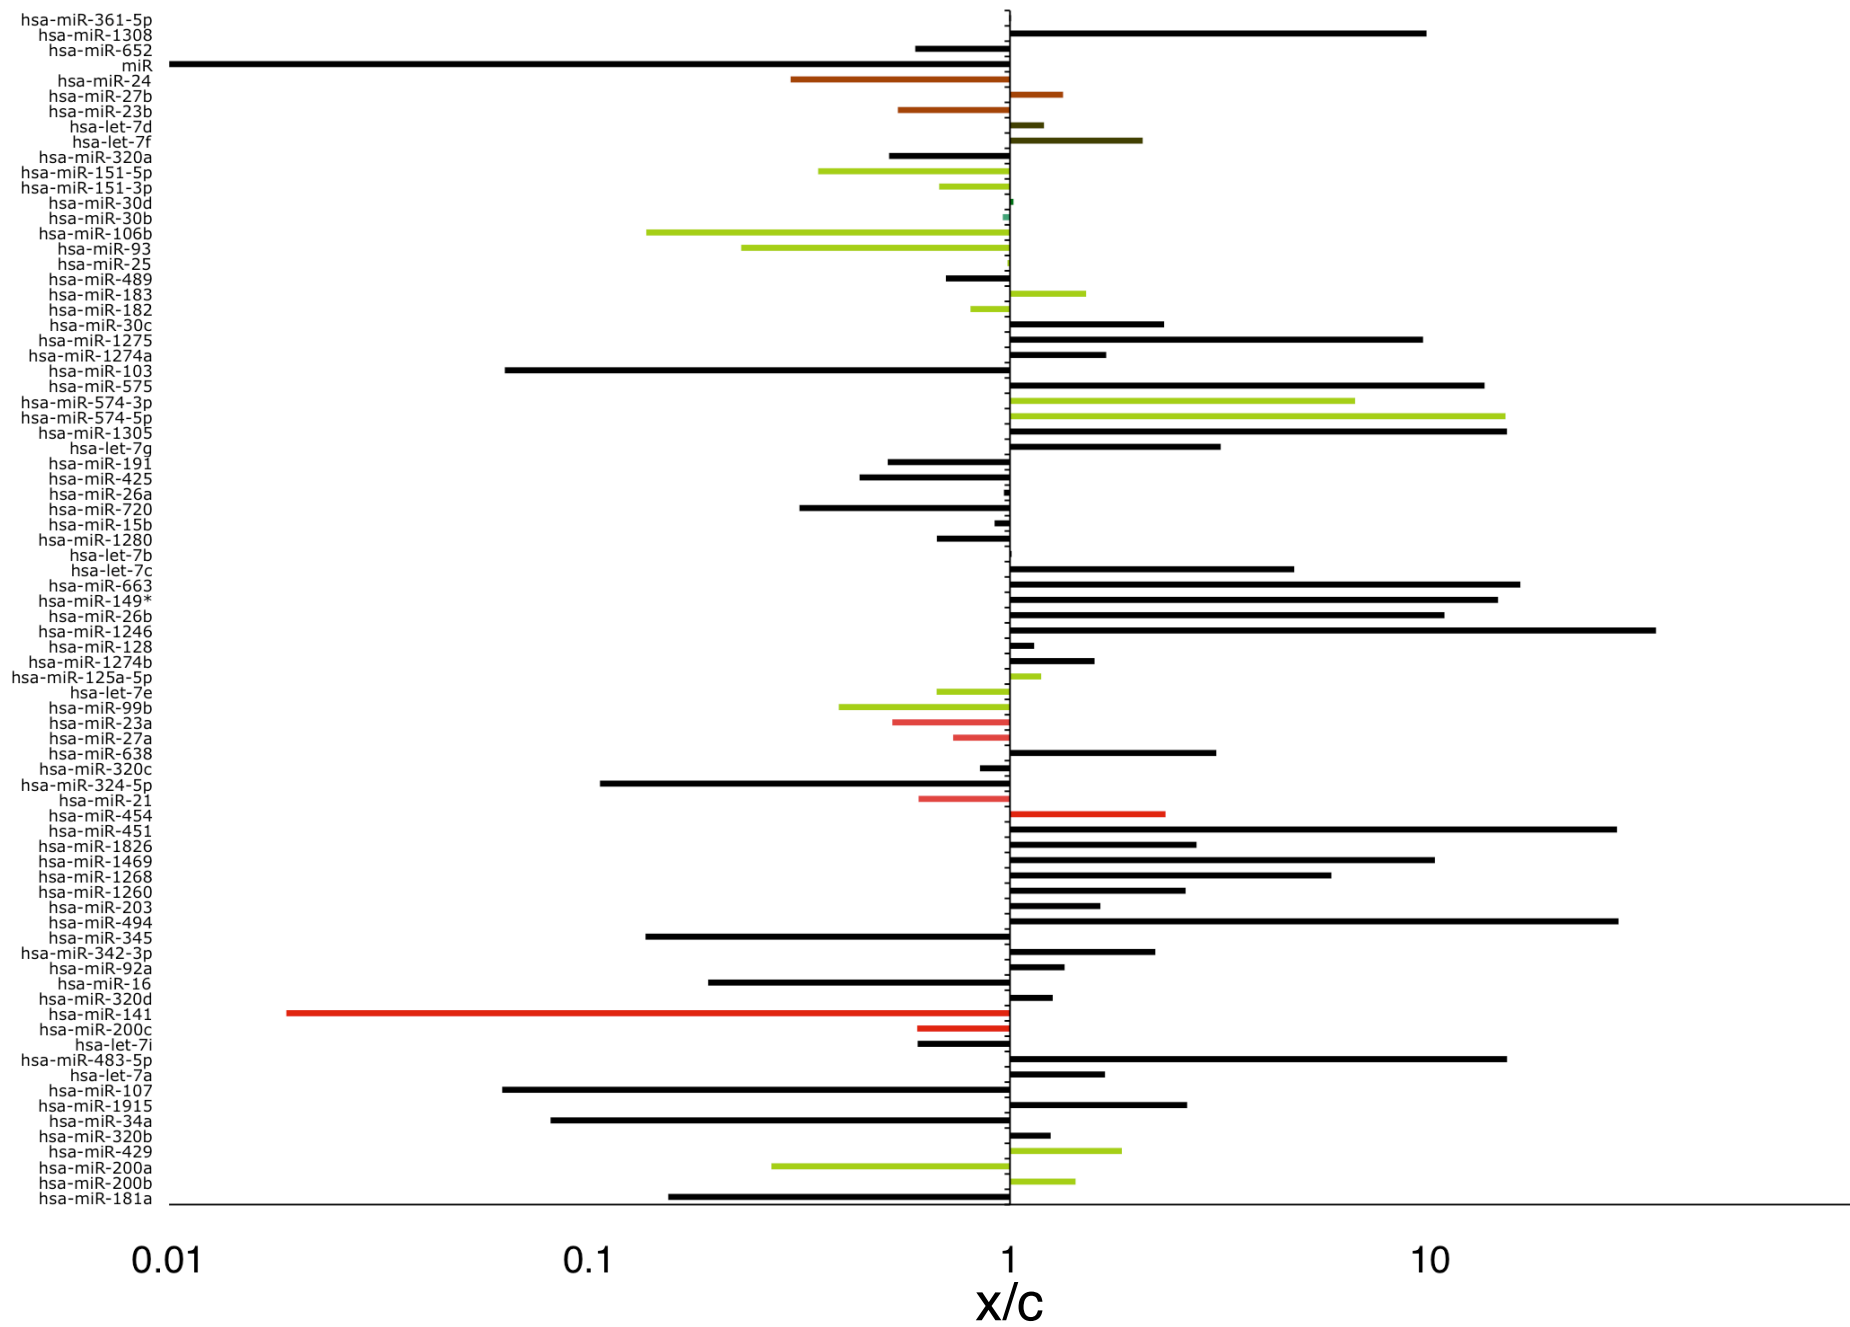

Pigati et al. Supplemental Figure S2

**A**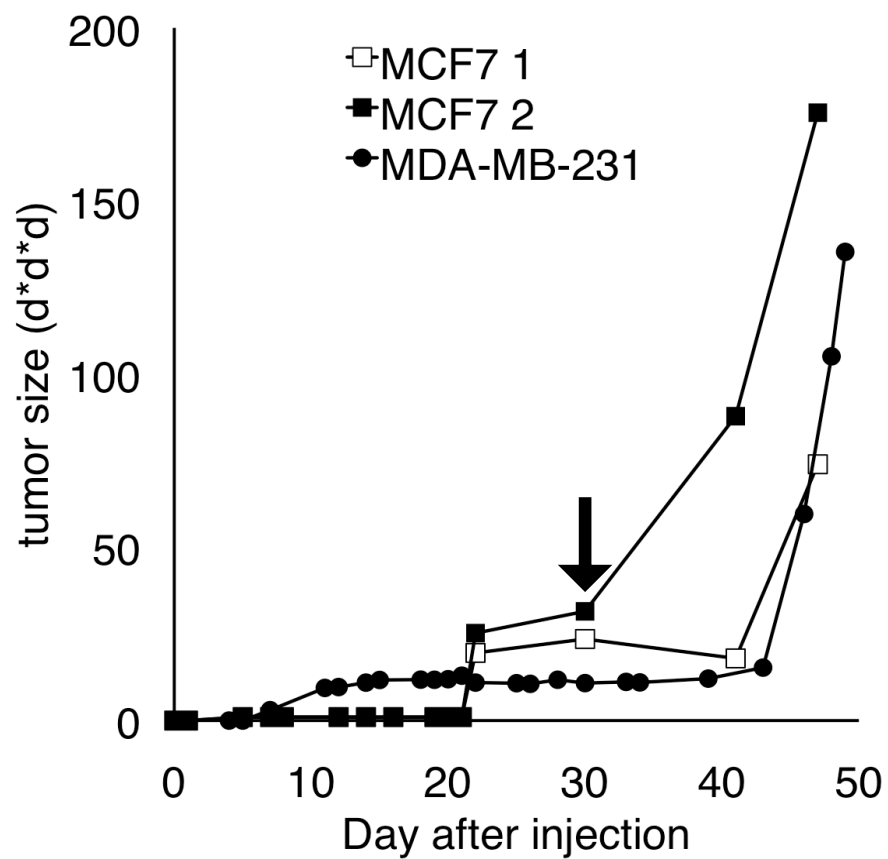**B**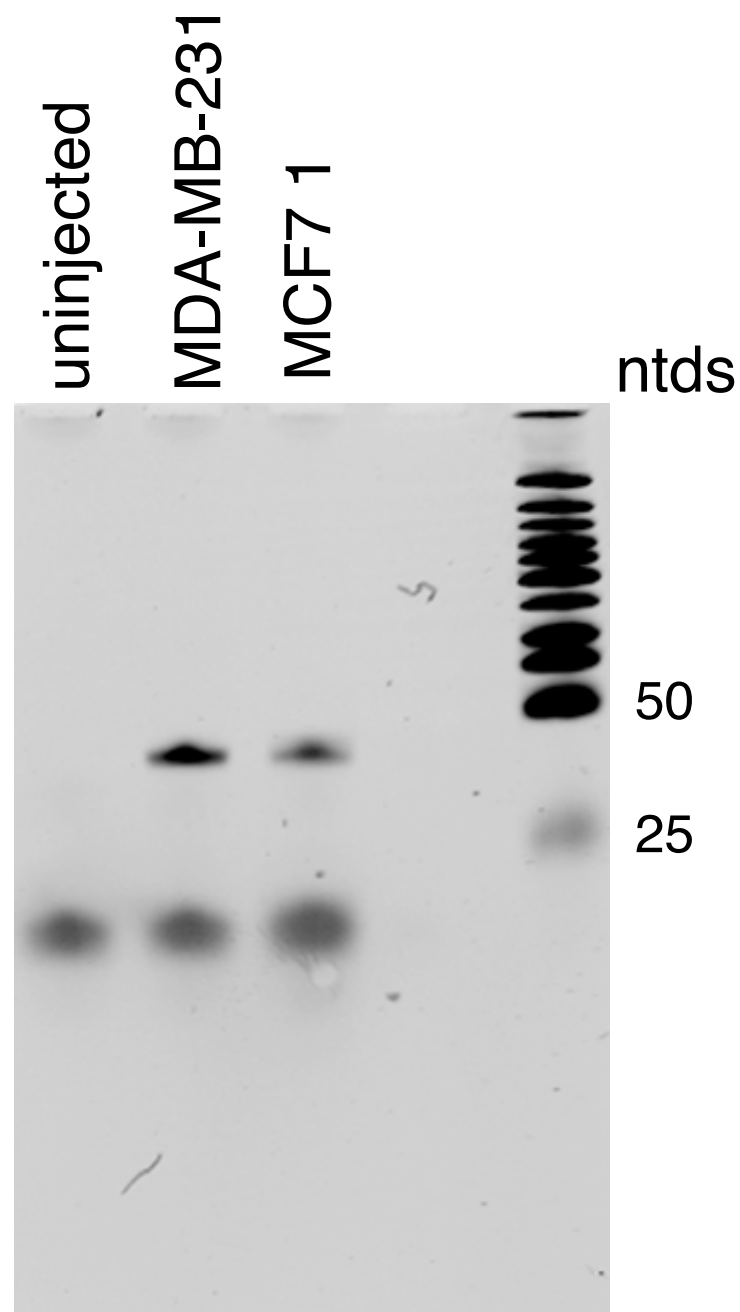

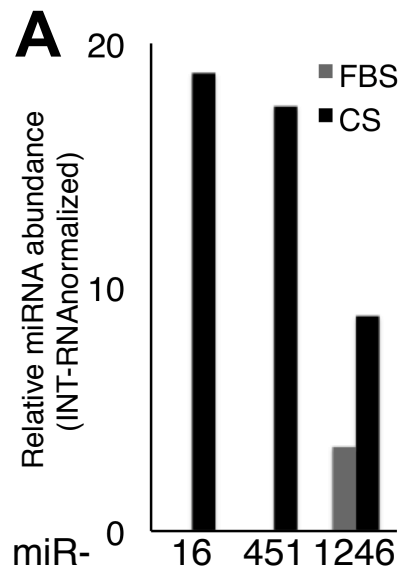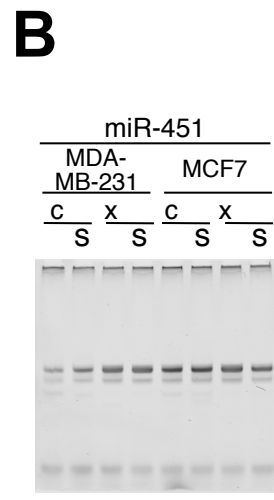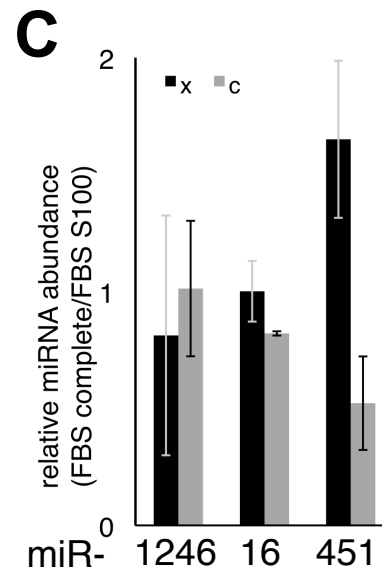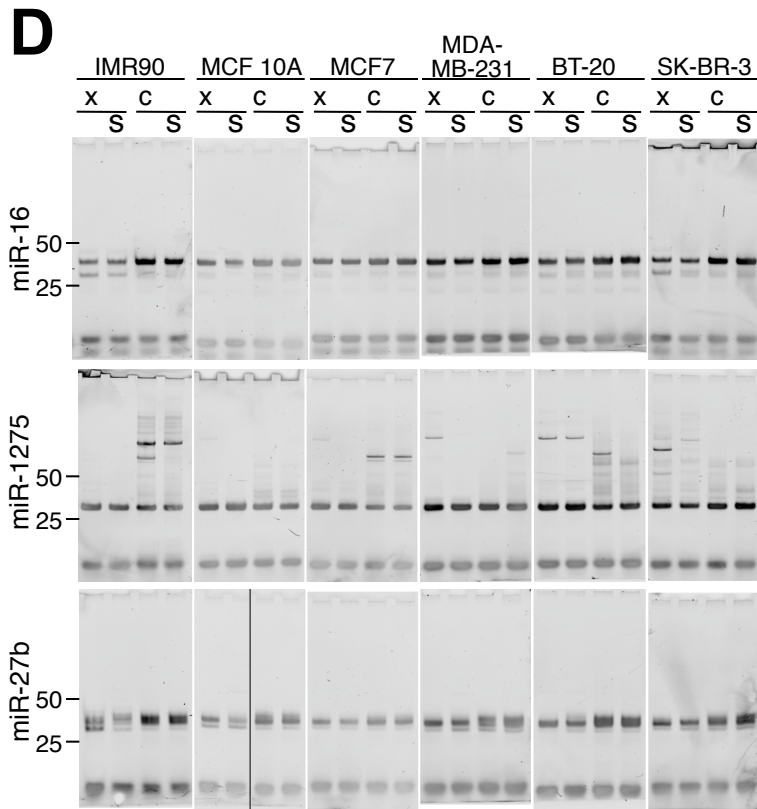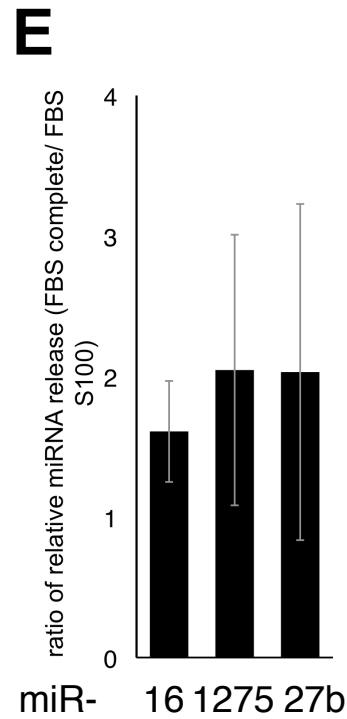

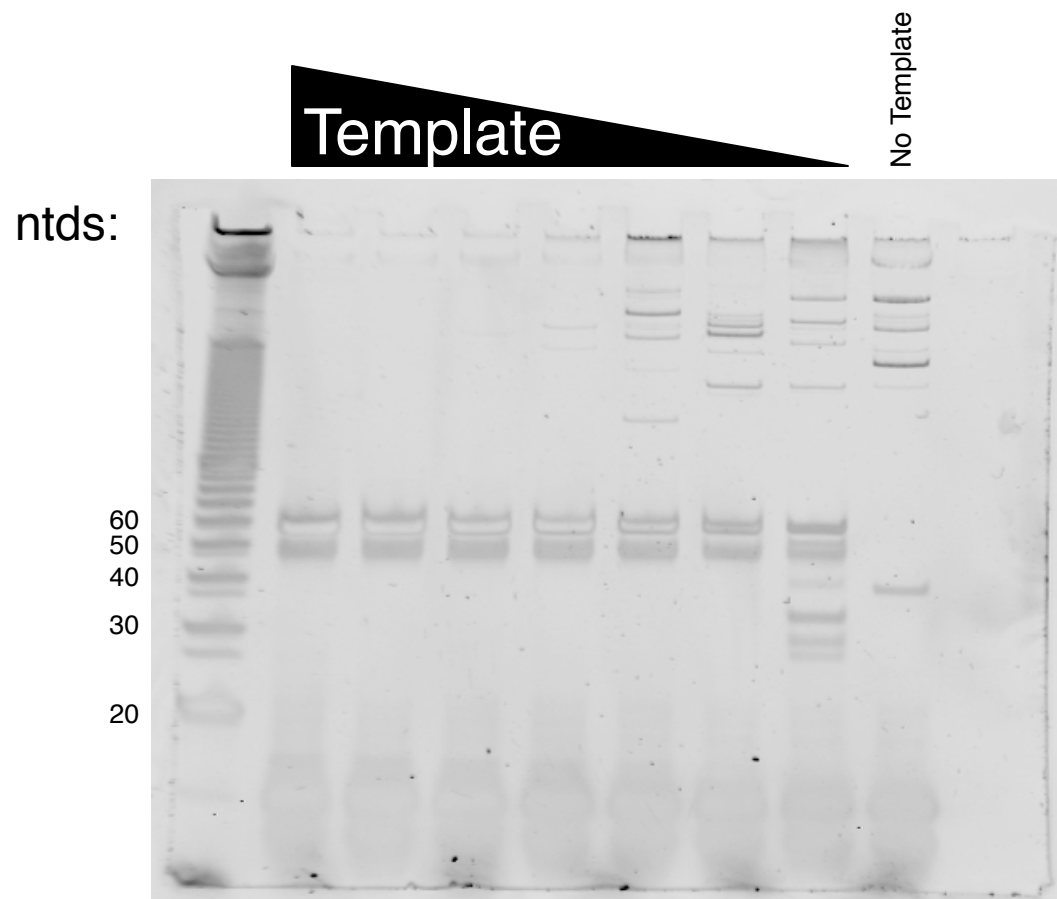

Pigati et al. Supplemental Figure S5
