# Supplementary material for: Selective Release of MicroRNA Species from Normal and Malignant Mammary Epithelial Cells
Source: PubMed Central journal article supplement (PMC2958125; doi:10.1371/journal.pone.0013515), 2010-10-20
Supplement: pone.0013515.s005.pdf [file pone.0013515.s005.pdf]

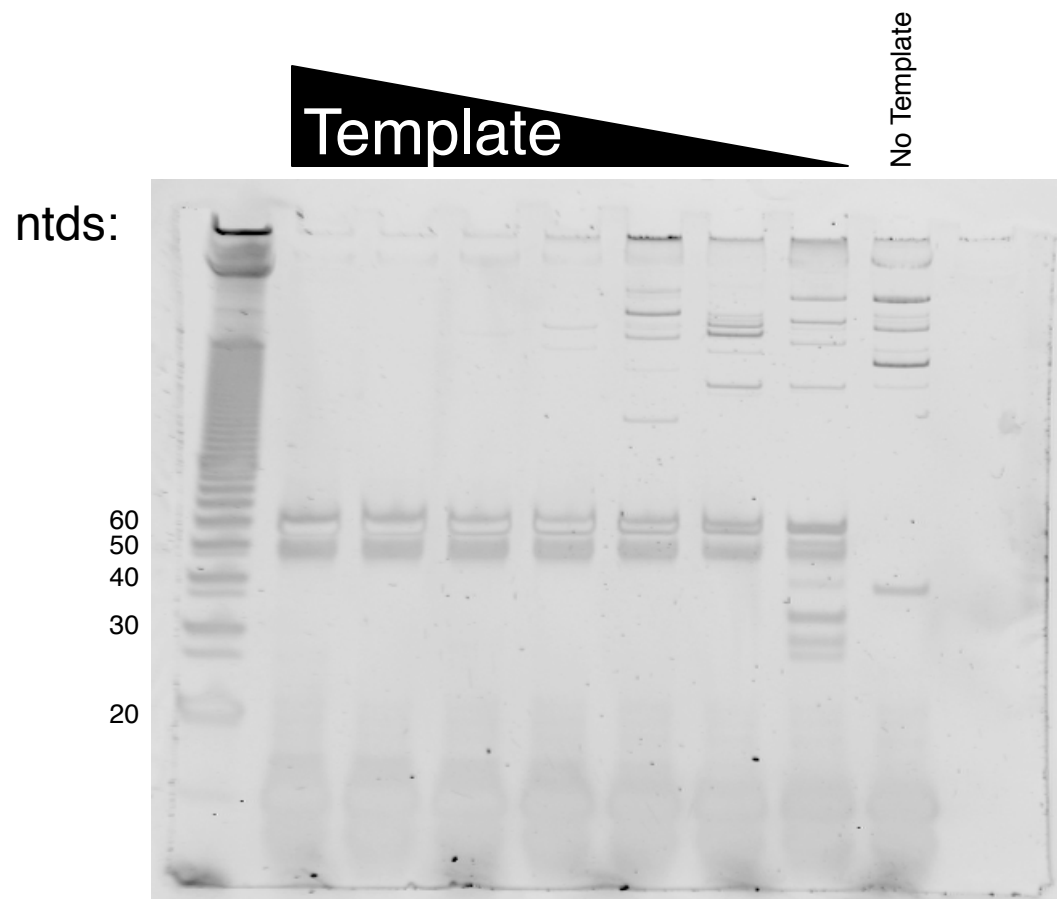

Pigati et al. Supplemental Figure S5
